# Supplementary material for: Pharmacophore generation and atom based 3D-QSAR of quinoline derivatives as selective phosphodiesterase 4B inhibitors
Source: Royal Society of Chemistry journal article supplement (doi:10.1039/c6ra11210b), 2016-01-01

**SUPPLEMENTARY FIGURES**

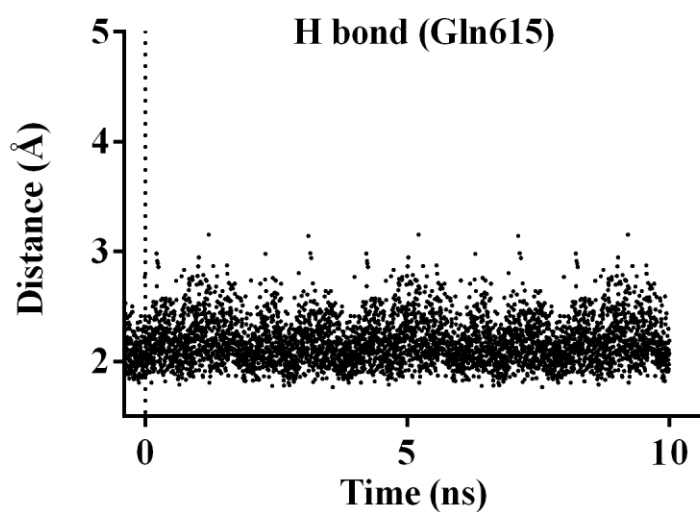

Supplementary Fig. 1. H-bond distance pattern with Gln615 during 10ns run of MD simulation.

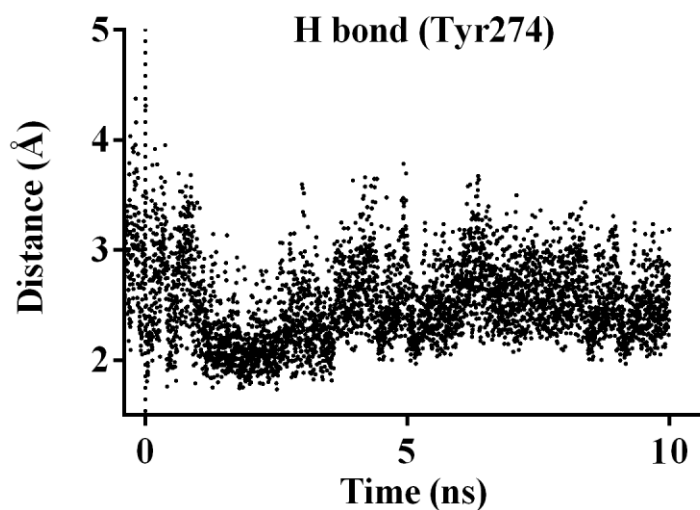

Supplementary Fig. 2. H-bond distance pattern with Tyr274 during 10ns of MD simulation.

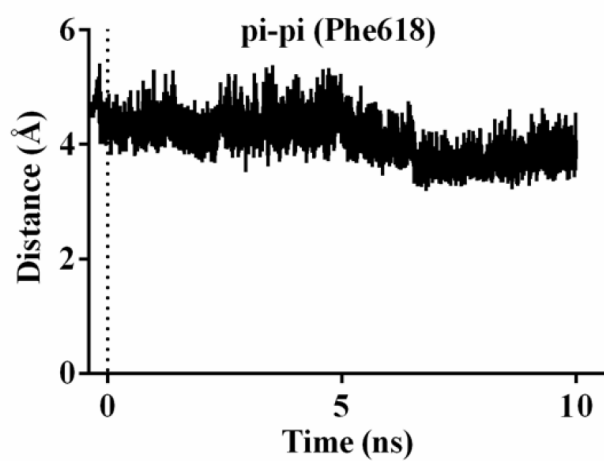

Supplementary Fig.3. Pi-pi interaction distance pattern with Phe618 during 10ns of MD simulation.

## SUPPLEMENTARY TABLES

Supplementary Table 1 List of all hypotheses produced. Hypothesis AADRR.1108 was considered for 3D-QSAR development and virtual screening.

| ID         | Survival | Survival - inactive | Site | Vector | Volume | # Matches | Energy | Activity | Inactive |
|------------|----------|---------------------|------|--------|--------|-----------|--------|----------|----------|
| AADRR.1268 | 42.7     | 41.3                | 0.4  | 0.8    | 0.4    | 40        | 1.7    | 8.7      | 1.4      |
| AADRR.1114 | 36.4     | 34.4                | 0.8  | 1.0    | 0.7    | 38        | 1.0    | 7        | 2.0      |
| AADRR.1108 | 36.4     | 34.6                | 0.8  | 0.9    | 0.7    | 38        | 1.0    | 7.4      | 1.8      |
| AADRR.1512 | 36.4     | 34.7                | 0.7  | 0.9    | 0.7    | 38        | 0.0    | 7        | 1.7      |
| AADRR.1509 | 36.3     | 34.6                | 0.7  | 0.9    | 0.7    | 38        | 1.5    | 7.5      | 1.7      |
| AADRR.1111 | 36.0     | 34.2                | 0.6  | 0.8    | 0.5    | 38        | 4.2    | 9.1      | 1.8      |
| AADRR.1524 | 33.4     | 31.2                | 0.8  | 1.0    | 0.7    | 37        | 0.1    | 7        | 2.2      |
| AADRR.1511 | 33.4     | 31.3                | 0.8  | 1.0    | 0.7    | 37        | 0.3    | 7.1      | 2.1      |
| AADRR.1523 | 33.3     | 31.3                | 0.8  | 1.0    | 0.6    | 37        | 1.7    | 8.5      | 2.0      |
| AADRR.1514 | 33.3     | 31.2                | 0.8  | 1.0    | 0.6    | 37        | 1.7    | 8.5      | 2.1      |
| AADRR.770  | 33.3     | 31.9                | 0.8  | 1.0    | 0.6    | 37        | 0.3    | 5.5      | 1.4      |
| AADRR.1118 | 33.3     | 31.4                | 0.7  | 0.9    | 0.7    | 37        | 0.0    | 6.3      | 1.9      |
| ADRR.50    | 27.9     | 25.9                | 0.7  | 0.9    | 0.7    | 35        | 2.4    | 8.8      | 2.0      |
| ADRR.33    | 27.8     | 25.9                | 0.7  | 0.9    | 0.7    | 35        | 0.1    | 7        | 1.9      |
| ADRR.32    | 27.8     | 25.9                | 0.7  | 0.9    | 0.7    | 35        | 0.1    | 7        | 1.9      |
| ADRR.29    | 27.7     | 25.7                | 0.6  | 0.9    | 0.6    | 35        | 1.7    | 8.5      | 1.9      |
| ADRR.24    | 27.7     | 25.9                | 0.6  | 0.9    | 0.6    | 35        | 0.2    | 7        | 1.8      |
| ADRR.38    | 27.7     | 25.7                | 0.7  | 0.9    | 0.5    | 35        | 1.9    | 8.5      | 2.0      |
| ADRR.35    | 27.5     | 25.7                | 0.6  | 0.9    | 0.5    | 35        | 4.1    | 11.1     | 1.8      |
| ADRR.34    | 27.5     | 25.7                | 0.6  | 0.9    | 0.5    | 35        | 4.1    | 11.1     | 1.8      |
| ADRR.83    | 27.1     | 25.7                | 0.3  | 0.8    | 0.4    | 35        | 1.4    | 8.7      | 1.4      |

Survival: Weighted combination of the vector, site, volume, and survival scores, and a term for the number of matches.

Survival –inactives: Survival score for actives with a multiple of the survival score for inactives subtracted.

Site: Site score, measures how closely the site points are superimposed in an alignment to the pharmacophore of the structures that contribute to this hypothesis, based on the RMS deviation of the site points of a ligand from those of the reference ligand.

Vector: Vector alignment score. This score measures how well the vectors for acceptors, donors, and aromatic rings are aligned in the structures that contribute to this hypothesis, when the structures themselves are aligned to the pharmacophore.

Volume: Measures how much the volumes of the contributing structures overlap when aligned on the pharmacophore. The volume score is the average of the individual volume scores. The individual volume score is the overlap of the volume of an aligned ligand with that of the reference ligand, divided by the total volume occupied by the two ligands.

# Matches: Number of actives that match the hypothesis.

Energy: Relative energy of the reference ligand in kcal/mol. This is the energy of the reference conformation relative to the lowest-energy conformation.

Activity: Activity of the reference ligand.

Inactive: Survival score of inactives. The scoring function is the same as for actives.

Supplementary Table 2 List of all quinoline analogues with their QSAR set and pharma set classification. Reported and predicted activity (PLS 4) is given in pIC50 values along with the fitness value of the ligands in the considered pharmacophore hypothesis.

| Ligand_names | QSAR Set | Activity | Predicted Activity 1 | Predicted Activity 2 | Predicted Activity 3 | Predicted Activity 4 | Pharm Set | Fitness |
|--------------|----------|----------|----------------------|----------------------|----------------------|----------------------|-----------|---------|
| W_1          | training | 8.4      | 7.4                  | 7.6                  | 7.7                  | 8.3                  | active    | 2.8     |
| W_2          | training | 11.1     | 9.3                  | 10.2                 | 11.1                 | 11.5                 | active    | 2.8     |
| W_3          | test     | 8.8      | 9.0                  | 9.0                  | 8.9                  | 8.9                  | active    | 3.0     |
| W_4          | training | 8.5      | 8.6                  | 8.4                  | 8.3                  | 8.7                  | active    | 2.8     |
| W_5          | training | 6.7      | 6.2                  | 5.5                  | 7.6                  | 7.1                  | active    | 0.9     |
| W_6          | test     | 6.8      | 6.5                  | 6.0                  | 7.7                  | 7.3                  | active    | 1.0     |
| W_7          | test     | 7.5      | 8.0                  | 7.7                  | 7.6                  | 7.7                  | active    | 2.6     |
| W_8          | training | 7.6      | 8.2                  | 8.0                  | 7.8                  | 7.9                  | active    | 2.6     |
| W_9          | training | 9.1      | 8.2                  | 8.2                  | 8.5                  | 9.0                  | active    | 2.7     |
| W_10         | test     | 8.7      | 8.6                  | 8.5                  | 8.5                  | 8.9                  | active    | 2.8     |
| W_11         | training | 8        | 8.9                  | 8.9                  | 8.4                  | 8.3                  | active    | 3.0     |
| W_12         | training | 8.5      | 6.6                  | 8.0                  | 8.0                  | 8.4                  | active    | 1.9     |
| W_13         | training | 8.2      | 8.8                  | 8.8                  | 8.4                  | 8.2                  | active    | 3.0     |
| W_14         | training | 7.4      | 8.4                  | 8.0                  | 7.2                  | 7.6                  | active    | 2.8     |
| W_15         | training | 7.4      | 8.8                  | 8.8                  | 8.3                  | 8.0                  | active    | 3.0     |
| W_16         | training | 8.6      | 8.2                  | 8.3                  | 8.9                  | 8.9                  | active    | 2.9     |
| W_17         | training | 7.9      | 8.5                  | 8.2                  | 7.6                  | 7.9                  | active    | 2.8     |
| W_18         | test     | 9.9      | 9.1                  | 9.3                  | 9.4                  | 9.7                  | active    | 2.9     |
| W_19         | test     | 9.2      | 9.0                  | 9.3                  | 9.2                  | 9.3                  | active    | 2.9     |
| W_20         | training | 11       | 9.2                  | 9.9                  | 10.6                 | 11.1                 | active    | 2.8     |
| W_21         | training | 8.8      | 9.1                  | 9.3                  | 9.3                  | 9.2                  | active    | 2.8     |
| W_22         | test     | 10       | 9.0                  | 9.3                  | 9.4                  | 9.7                  | active    | 2.9     |
| W_23         | training | 10.7     | 9.2                  | 9.6                  | 10.0                 | 10.5                 | active    | 2.9     |
| L_1          | training | 7        | 6.7                  | 8.1                  | 7.6                  | 7.3                  | active    | 2.0     |
| L_2          | training | 8.4      | 7.6                  | 7.8                  | 7.9                  | 8.3                  | active    | 2.8     |
| L_3          | training | 8.8      | 7.9                  | 9.0                  | 9.4                  | 8.9                  | active    | 3.0     |
| L_4          | training | 5.5      | 7.6                  | 6.4                  | 6.1                  | 5.7                  | active    | 2.6     |
| L_5          |          | 4.7      |                      |                      |                      |                      | inactive  |         |
| L_6          | test     | 6.3      | 7.1                  | 6.5                  | 7.1                  | 7.0                  | active    | 1.8     |
| L_7          | training | 6.6      | 5.8                  | 6.0                  | 6.1                  | 6.8                  | active    | 1.7     |

|      |          |     |     |     |      |      |          |     |
|------|----------|-----|-----|-----|------|------|----------|-----|
| L_8  | training | 4.9 | 5.7 | 5.4 | 5.0  | 5.5  |          | 1.7 |
| L_9  | training | 5.5 | 7.5 | 6.0 | 5.9  | 5.6  | active   | 2.5 |
| L_10 | training | 4.7 | 6.0 | 6.0 | 4.7  | 4.8  | inactive | 1.7 |
| L_11 | training | 4.8 | 5.5 | 4.5 | 4.1  | 4.9  | inactive | 1.5 |
| L_12 | training | 5.1 | 6.6 | 4.9 | 4.9  | 4.8  |          | 1.5 |
| L_13 | training | 4.5 | 5.6 | 4.7 | 4.0  | 4.5  | inactive | 1.6 |
| L_14 | training | 4.5 | 5.6 | 5.0 | 4.7  | 4.3  | inactive | 1.5 |
| L_15 | training | 7.8 | 6.5 | 7.5 | 7.7  | 7.9  | active   | 1.8 |
| L_16 | training | 7.7 | 7.0 | 6.1 | 7.8  | 7.9  | active   | 1.7 |
| L_17 | training | 8.6 | 7.8 | 7.0 | 7.7  | 7.9  | active   | 2.6 |
| L_18 | training | 7   | 8.2 | 7.5 | 6.8  | 6.9  | active   | 2.9 |
| L_19 | training | 7.1 | 6.6 | 8.0 | 7.6  | 7.2  | active   | 1.9 |
| L_20 | training | 5.3 | 8.1 | 7.2 | 6.3  | 5.9  |          | 2.8 |
| L_21 | training | 7.5 | 6.5 | 7.9 | 8.1  | 7.8  | active   | 1.8 |
| L_22 | training | 8.2 | 6.5 | 7.7 | 7.7  | 8.0  | active   | 1.9 |
| L_23 | training | 6   | 6.7 | 5.2 | 6.4  | 5.9  | active   | 1.4 |
| L_24 | training | 9.5 | 6.9 | 8.7 | 8.8  | 8.8  | active   | 1.9 |
| L_25 | training | 8.3 | 6.8 | 8.5 | 8.3  | 8.3  | active   | 1.9 |
| L_26 | training | 9.4 | 8.4 | 8.8 | 8.92 | 9.18 | active   | 2   |

Supplementary Table 3. External  $r^2$  prediction of activity of dataset of reported PDE4B inhibitors for validation of developed QSAR model.

| S.No. | Molecule                                                                            | Experimental $pIc_{50}$ | Predicted $pIc_{50}$ |
|-------|-------------------------------------------------------------------------------------|-------------------------|----------------------|
| 1.    | 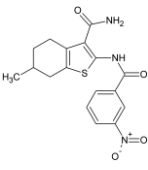   | 6.8                     | 6.9                  |
| 2.    |    | 7.5                     | 7.2                  |
| 3.    |   | 6.4                     | 6.0                  |
| 4.    |  | 8.6                     | 8.8                  |
| 5.    |  | 5.3                     | 4.9                  |
| 6.    |  | 7.3                     | 7.2                  |
| 7.    |  | 8.0                     | 8.2                  |
|       |                                                                                     |                         |                      |

|     |                                                                                     |     |     |
|-----|-------------------------------------------------------------------------------------|-----|-----|
| 8.  | 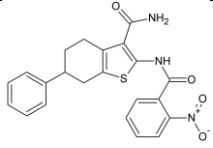   | 6.4 | 6.1 |
| 9.  |    | 5.3 | 5.0 |
| 10. |    | 5.7 | 5.4 |
| 11. |    | 6.7 | 6.5 |
| 12. |   | 7.1 | 7.2 |
| 13. |  | 5.7 | 5.4 |
| 14. |  | 6.0 | 6.1 |
| 15. |  | 8.9 | 9.0 |
|     |                                                                                     |     |     |

|     |                                                                                     |     |     |
|-----|-------------------------------------------------------------------------------------|-----|-----|
| 16. | 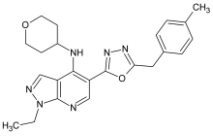   | 8.0 | 8.1 |
| 17. |    | 8.4 | 8.2 |
| 18. |    | 9.1 | 9.0 |
| 19. |   | 9.4 | 9.6 |
| 20. |  | 7.8 | 7.9 |



Supplementary Table 4 Predicted absorption, distribution, metabolism and Excretion (ADME) properties of all PDE4B selective molecules

| Molecule        | #rtvFG | CNS | mol_MW | SASA  | FOSA  | FISA  | donorHB | accptHB | QPlogPo/w | QPPCaco | QPlogBB | #metab | QPlogKhsa | % HumanOralAbsorption | RuleOfFive | Rule of three |
|-----------------|--------|-----|--------|-------|-------|-------|---------|---------|-----------|---------|---------|--------|-----------|-----------------------|------------|---------------|
| AO-022/43453692 | 0      | -1  | 435.9  | 735.2 | 249.3 | 110.3 | 1       | 7       | 4.4       | 891.7   | -0.8    | 2      | 0.5       | 100                   | 0          | 1             |
| AQ-390/42425549 | 0      | -2  | 435.9  | 767.8 | 319.7 | 115.0 | 1       | 7       | 4.5       | 804.4   | -1.1    | 2      | 0.5       | 100                   | 0          | 1             |
| AG-205/36564043 | 0      | -1  | 295.3  | 532.9 | 90.2  | 99.9  | 2       | 4.5     | 3.4       | 283.3   | -0.5    | 4      | 0.0       | 91.0                  | 0          | 0             |
| AP-964/40915318 | 0      | -2  | 422.9  | 692.2 | 193.6 | 177.6 | 3       | 5       | 4.0       | 204.8   | -1.5    | 5      | 0.6       | 91.4                  | 0          | 1             |
| AO-022/43390834 | 0      | -2  | 430.6  | 773.5 | 311.7 | 136.5 | 3.5     | 5       | 4.9       | 502.6   | -1.4    | 1      | 0.9       | 100                   | 0          | 1             |
| AK-968/12386394 | 0      | 0   | 464.4  | 705.3 | 327.3 | 118.4 | 0       | 6.5     | 4.4       | 745.9   | -0.6    | 2      | 0.3       | 100                   | 0          | 1             |
| AG-690/10252051 | 0      | -1  | 481.1  | 669.2 | 78.0  | 140.1 | 2       | 6       | 3.7       | 464.5   | -0.9    | 4      | 0.3       | 96.1                  | 0          | 1             |
| AF-399/15335138 | 0      | -1  | 515.7  | 845.5 | 542.2 | 102.7 | 0       | 7.5     | 5.4       | 1052.9  | -0.7    | 8      | 0.7       | 86.8                  | 2          | 2             |
| AG-690/36873050 | 0      | -2  | 457.5  | 776.7 | 316.4 | 105.9 | 3       | 7.8     | 4.4       | 981.1   | -1.2    | 4      | 0.4       | 100                   | 0          | 0             |
| AO-476/43407280 | 2      | 0   | 385.8  | 640.3 | 211.3 | 97.6  | 0       | 6.3     | 3.5       | 1175.0  | -0.5    | 2      | 0.0       | 100                   | 0          | 0             |
| AF-399/42316263 | 0      | 1   | 407.5  | 673.0 | 371.5 | 84.4  | 1       | 6.8     | 3.3       | 390.9   | -0.1    | 3      | 0.5       | 92.9                  | 0          | 0             |
| AT-057/43469096 | 0      | 1   | 361.3  | 604.1 | 0.7   | 76.1  | 2       | 4       | 4.3       | 1880.0  | 0.1     | 1      | 0.5       | 100                   | 0          | 1             |
| AF-399/41980308 | 0      | 0   | 363.8  | 667.4 | 166.6 | 72.3  | 1       | 3.5     | 5.3       | 2044.4  | -0.3    | 3      | 0.9       | 100                   | 1          | 1             |
| AG-690/36276042 | 0      | 0   | 467.0  | 802.8 | 245.3 | 60.7  | 0       | 5       | 6.7       | 2631.3  | -0.3    | 4      | 1.2       | 100                   | 1          | 1             |
| AJ-292/42152568 | 0      | -2  | 484.9  | 737.6 | 90.6  | 173.3 | 3       | 5       | 4.9       | 225.1   | -1.4    | 4      | 0.95      | 100.0                 | 0          | 1             |
| AG-690/36276051 | 0      | -1  | 361.5  | 670.0 | 556.5 | 97.9  | 1       | 5.5     | 3.9       | 1169.4  | -0.8    | 0      | 0.4       | 100                   | 0          | 0             |
| AG-690/11972161 | 0      | -2  | 428.6  | 780.2 | 469.4 | 95.8  | 1       | 5       | 5.7       | 1224.0  | -1.2    | 1      | 1.0       | 100                   | 1          | 1             |
| AK-968/37005156 | 0      | -1  | 399.8  | 692.8 | 250.9 | 105.0 | 2       | 4.8     | 4.5       | 1000.5  | -0.8    | 4      | 0.6       | 100                   | 0          | 1             |
| AG-205/33161053 | 0      | -2  | 349.4  | 683.7 | 198.4 | 100.9 | 3       | 7.3     | 3.0       | 1093.7  | -1.0    | 2      | -0.05     | 100.0                 | 0          | 0             |
| AG-690/15437723 | 0      | -2  | 396.5  | 692.9 | 229.7 | 134.4 | 1       | 8       | 3.2       | 526.2   | -1.1    | 1      | 0.1       | 94.5                  | 0          | 0             |
| AP-124/43383688 | 0      | -1  | 313.4  | 639.9 | 386.1 | 103.3 | 1       | 5.5     | 3.4       | 1037.8  | -0.8    | 5      | 0.4       | 100                   | 0          | 0             |

#### Parameters

- #rtvFG Number of reactive functional groups. The presence of these groups can lead to false positives in HTS assays and to decomposition, reactivity, or toxicity problems in vivo (0-2)
- CNS Predicted central nervous system activity -2 (inactive) to 2(active)
- mol\_MW Molecular weight of the molecule
- SASA Total solvent accessible surface area (SASA) in square angstroms using a probe with a 1.4 Å radius (300.0 – 1000.0)

|                         |                                                                                                                                                                                                                                                                |
|-------------------------|----------------------------------------------------------------------------------------------------------------------------------------------------------------------------------------------------------------------------------------------------------------|
| FOSA                    | Hydrophobic component of the SASA (saturated carbon and attached hydrogen)                                                                                                                                                                                     |
| FISA                    | Hydrophilic component of the SASA (SASA on N, O, and H on heteroatoms).                                                                                                                                                                                        |
| donorHB                 | Estimated number of hydrogen bonds that would be donated by the solute to water molecules in an aqueous solution                                                                                                                                               |
| accptHB                 | Estimated number of hydrogen bonds that would be accepted by the solute from water molecules in an aqueous solution                                                                                                                                            |
| QPlogPo/w               | Predicted octanol/water partition coefficient.                                                                                                                                                                                                                 |
| QPPCaco                 | Predicted apparent Caco-2 cell permeability in nm/sec (<25 poor >500 great)                                                                                                                                                                                    |
| QPlogBB                 | Predicted brain/blood partition coefficient (range or recommended value for 95% of known drugs -3 – 1.2);                                                                                                                                                      |
| #metab                  | Number of likely metabolic reactions (1 – 8)                                                                                                                                                                                                                   |
| QPlogKhsa               | Prediction of binding to human serum albumin. (-1.5 – 1,5)                                                                                                                                                                                                     |
| % Human Oral Absorption | Predicted human oral absorption on 0 to 100% scale (25% - 80%). The prediction is based on a quantitative multiple linear regression model. This property usually correlates well with HumanOralAbsorption, as both measure the same property.                 |
| Rule Of Five            | Indicates the number of violation of Lipinski's rule of five. Compounds that satisfy these rules are considered drug-like (maximum is 4)                                                                                                                       |
| Rule of Three           | Number of violations of Jorgensen's rule of three. The three rules are: QPlogS > -5.7, QP PCaco > 22 nm/s, # Primary Metabolites < 7. Compounds with fewer (and preferably no) violations of these rules are more likely to be orally available (maximum is 3) |

Supplementary Table 5 Chemical structure of all PDE4B selective molecules and their Specs IDs

|                                                                                                        |                                                                                                        |                                                                                                          |
|--------------------------------------------------------------------------------------------------------|--------------------------------------------------------------------------------------------------------|----------------------------------------------------------------------------------------------------------|
| AG-690/36276042<br>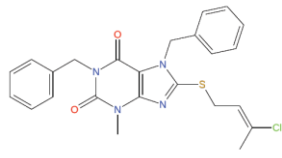   | AO-022/43390834<br>   | AQ-390/42425549<br>   |
| AG-205/36564043<br>   | AO-476/43407280<br>   | AG-690/36873050<br>   |
| AJ-292/42152568<br>  | AF-399/42316263<br>   | AP-964/40915318<br>   |
| AT-057/43469096<br> | AF-399/41980308<br> | AO-022/43453692<br> |
| AK-968/12386394<br> | AF-399/15335138<br> | AG-690/10252051<br> |
| AG-690/36276051<br> | AG-690/11972161<br> | AK-968/37005156<br> |
| AG-205/33161053<br> | AG-690/15437723<br> | AP-124/43383688<br> |

cAMP

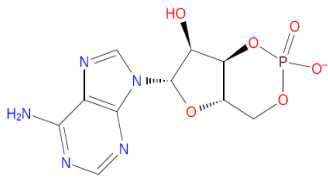

Rolipram

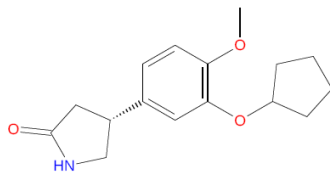

Roflumilast

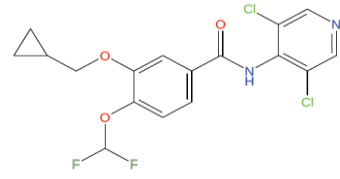

Supplement: c6ra11210b1.pdf [file c6ra11210b1.pdf]
